# Supplementary material
Source: Springer Nature journal article supplement (https://www.springermedizin.de/resource/supplementary/13256_2012_2319_MOESM2_ESM.pdf/9649466)
Supplement: MOESM2 [file 9649466]

Original CT images

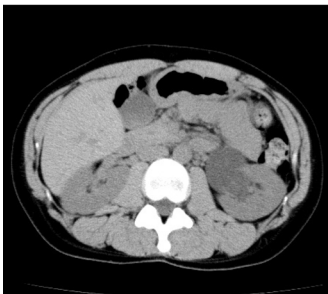

3D reconstruction

(The reconstructed images from CT)

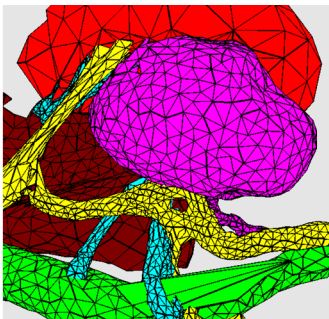

Simulator

(The crossing veins run dorsal to the ureter)

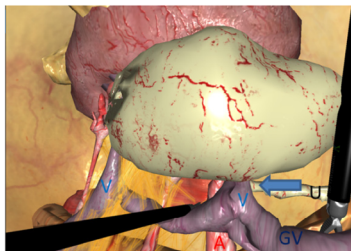

A:Renal Artery      V:Renal Vein  
GV:Gonadal Vein    U:Ureter

Operation

(The crossing veins run ventral to the ureter)

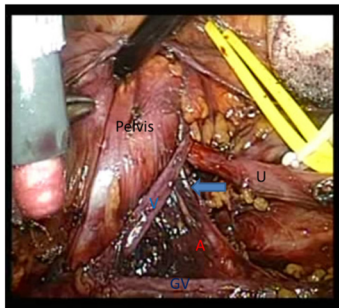

A:Renal Artery      V:Renal Vein  
GV:Gonadal Vein    U:Ureter
